# Supplementary material
Source: PubMed Central journal article supplement (PMC6503570)
Supplement: jamainternmed-179-676-s001.pdf [file jamainternmed-179-676-s001.pdf]

## Supplementary Online Content

Scheunemann LP, Ernecoff NC, Buddadhumaruk P, et al. Clinician-family communication about patients' values and preferences in intensive care units. *JAMA Intern Med*. Published online April 1, 2019. doi:10.1001/jamainternmed.2019.0027

### **eTable.** Frequency of Discussion of Treatment Options

This supplementary material has been provided by the authors to give readers additional information about their work.

**eTable. Frequency of Discussion of Treatment Options.**

| <b>Treatment Option Discussed</b> | <b>Conferences, n (%)</b><br><b>N = 249</b> |
|-----------------------------------|---------------------------------------------|
| <b>Life support</b>               |                                             |
| Mechanical ventilation            | 239 (96.0%)                                 |
| Dialysis/plasmapheresis           | 89 (35.7%)                                  |
| ECMO                              | 2 (0.8%)                                    |
| <b>Prolonged support</b>          |                                             |
| Tracheostomy                      | 76 (30.5%)                                  |
| PEG                               | 33 (13.3%)                                  |
| LTACH/SNF/rehabilitation          | 99 (39.8%)                                  |
| <b>Treatment limitation</b>       |                                             |
| CPR                               | 57 (22.9%)                                  |
| Comfort care                      | 48 (19.3%)                                  |
| <b>Any option discussed</b>       | <b>244 (98.0%)</b>                          |

CPR, cardiopulmonary resuscitation; ECMO, extracorporeal membrane oxygenation; LTACH, long-term acute care hospital; PEG, percutaneous gastrostomy; SNF, skilled nursing facility.
